# Supplementary material
Source: publisher figshare collection journal article supplement (https://future-science-group.figshare.com/ndownloader/files/14652749)
Supplement: Supplementary file 1 [file 14652749]

# Supplemental DLS data

**(AUTHOR INFORMATION TO BE PLACED HERE AFTER REVIEW)**

All figures are correlation functions from DLS analyses of isolated exosome samples. Table 1 shows an overview of the figure number related to the sample code of interest, together with the measured hydrodynamic radius in the samples.

Table 1. Figure number of the related correlation function to the different sample codes, together with the measured hydrodynamic radius (nm).

| **Figure #** | **Sample code** | **Hydrodynamic radius (fast) in nm.** | **Hydrodynamic radius (slow) in nm.** |
| --- | --- | --- | --- |
| **Figure 1** | **BC UC 1** | **83.13** | **--** |
| **Figure 2** | **BC UC 2** | **64.1** | **--** |
| **Figure 3** | **BC UC 3** | **59.18** | **--** |
| **Figure 4** | **BC kit 1** | **13.5** | **52.1** |
| **Figure 5** | **BC kit 2** | **13.9** | **43.1** |
| **Figure 6** | **GBM UC 1** | **25.6** |  |
| **Figure 7** | **GBM kit 1** | **36.7** |  |

Figure 1. Correlation function of BC UC replicate 1.

Figure 2. Correlation function of BC UC replicate 2.

Figure 3. Correlation function of BC UC replicate 3.

| Figure 4. Correlation function of BC kit replicate 1. |
| --- |
| Figure 5. Correlation function of BC kit replicate 2. |

Figure 6. Correlation function of GBM UC replicate 1.

Figure 7. Correlation function of GBM kit replicate 1.
